# Supplementary material for: Conformational change of adenine nucleotide translocase‐1 mediates cisplatin resistance induced by EBV‐LMP1
Source: PubMed Central journal article supplement (PMC8649884; doi:10.15252/emmm.202114072), 2021-11-09
Supplement: EMMM-13-e14072-s003.pdf [file EMMM-13-e14072-s003.pdf]

## Expanded View Figures

### Figure EV1. EBV-LMP1 interacting with ANT1 localizes to mitochondria.

- A Knockdown effect of mPTP complex components.
- B Effect of knockdown of each mPTP component on the membrane potential of EBV-LMP1-negative or EBV-LMP1-positive nasopharyngeal carcinoma cells. Data are presented as means  $\pm$  SEM (paired *t*-test, *n* = 5, biological replicates per group, \**P* < 0.05, \*\**P* < 0.01).
- C, D The specificity of ANT1 antibody was verified in this experiment using: knockdown or overexpression of ANT1 in HK1 cells, respectively (C); expression of HK1-derived ANT1 in prokaryotes and validation after purification (D).
- E LMP1 is present in the cytoplasm and mitochondria. EBV-LMP1-positive nasopharyngeal carcinoma cells were isolated from cytoplasm and mitochondria and western blot assayed for LMP1 expression.
- F Co-IP detection of the interaction of EBV-LMP1 and ANT1 in CNE1-LMP1 cells.
- G Laser confocal analysis of CNE1-LMP1 cells revealed the presence of co-localization of LMP1 with ANT1 (scale bar, 5  $\mu$ m). The quantified graph on the lower right shows the percentage of yellow fluorescence (merge) to red fluorescence (ANT1) in CNE1-LMP1 cells. Data are presented as means  $\pm$  SEM (*n* = 6, biological replicates per group).
- H PLA detects the presence of direct binding of LMP1 to ANT1, but not VDAC1, in CNE1-LMP1 cells (scale bar, 10  $\mu$ m).

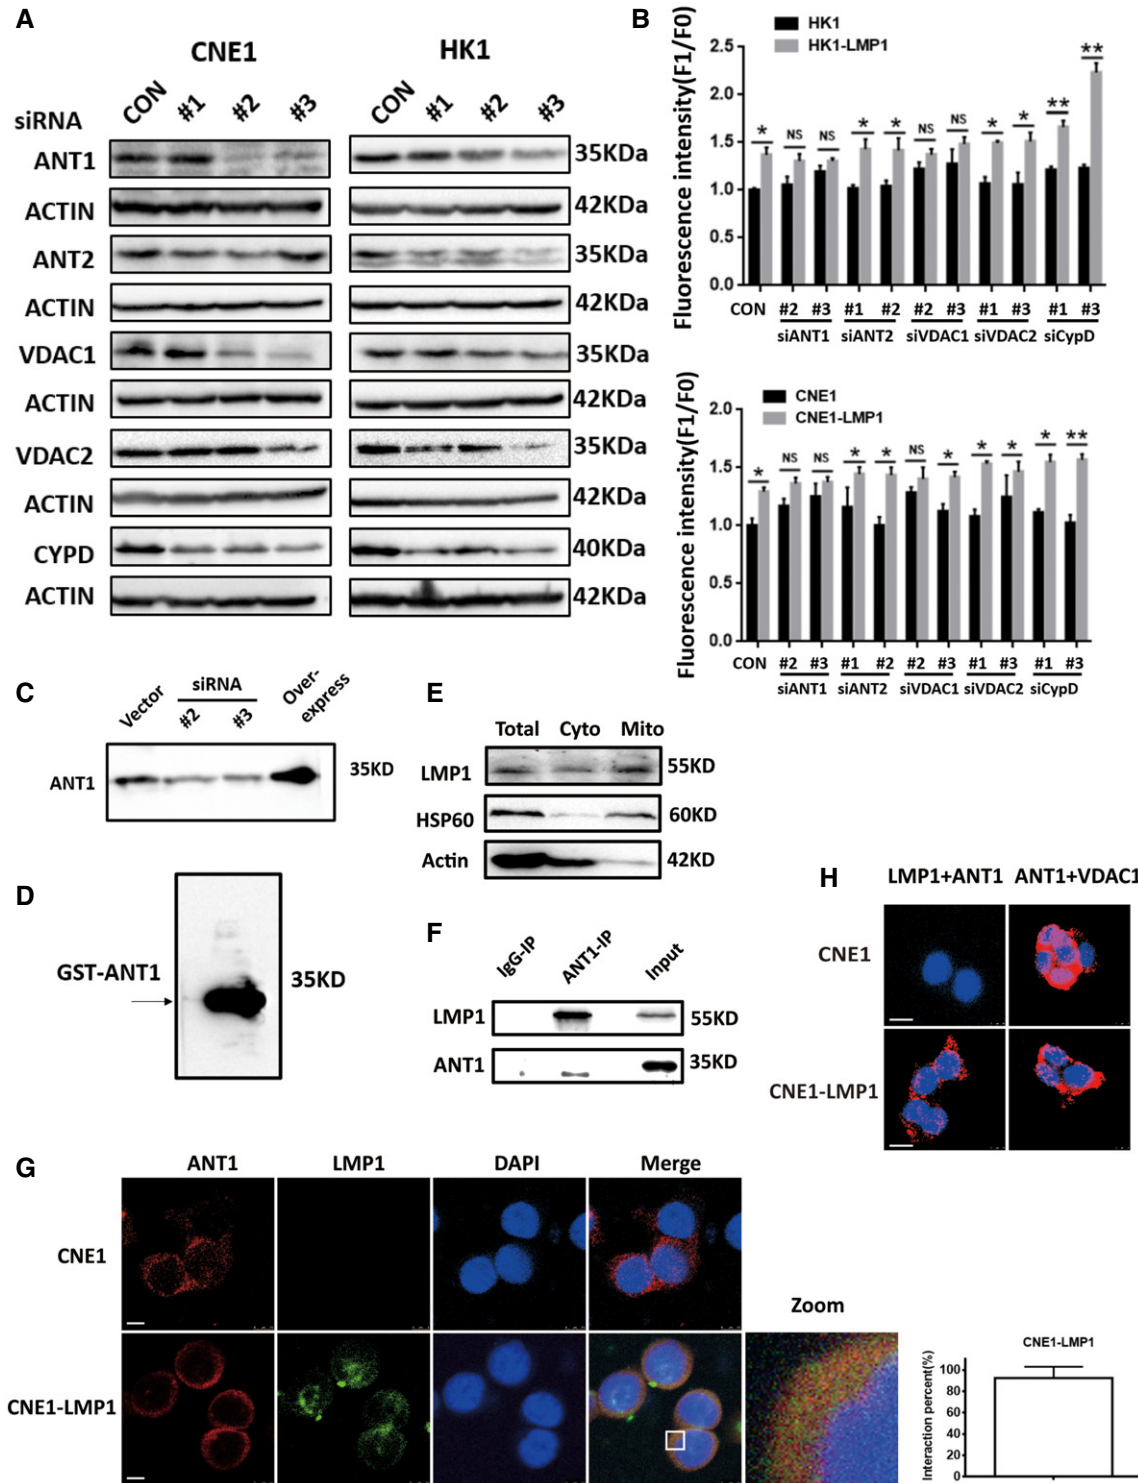

Figure EV1.

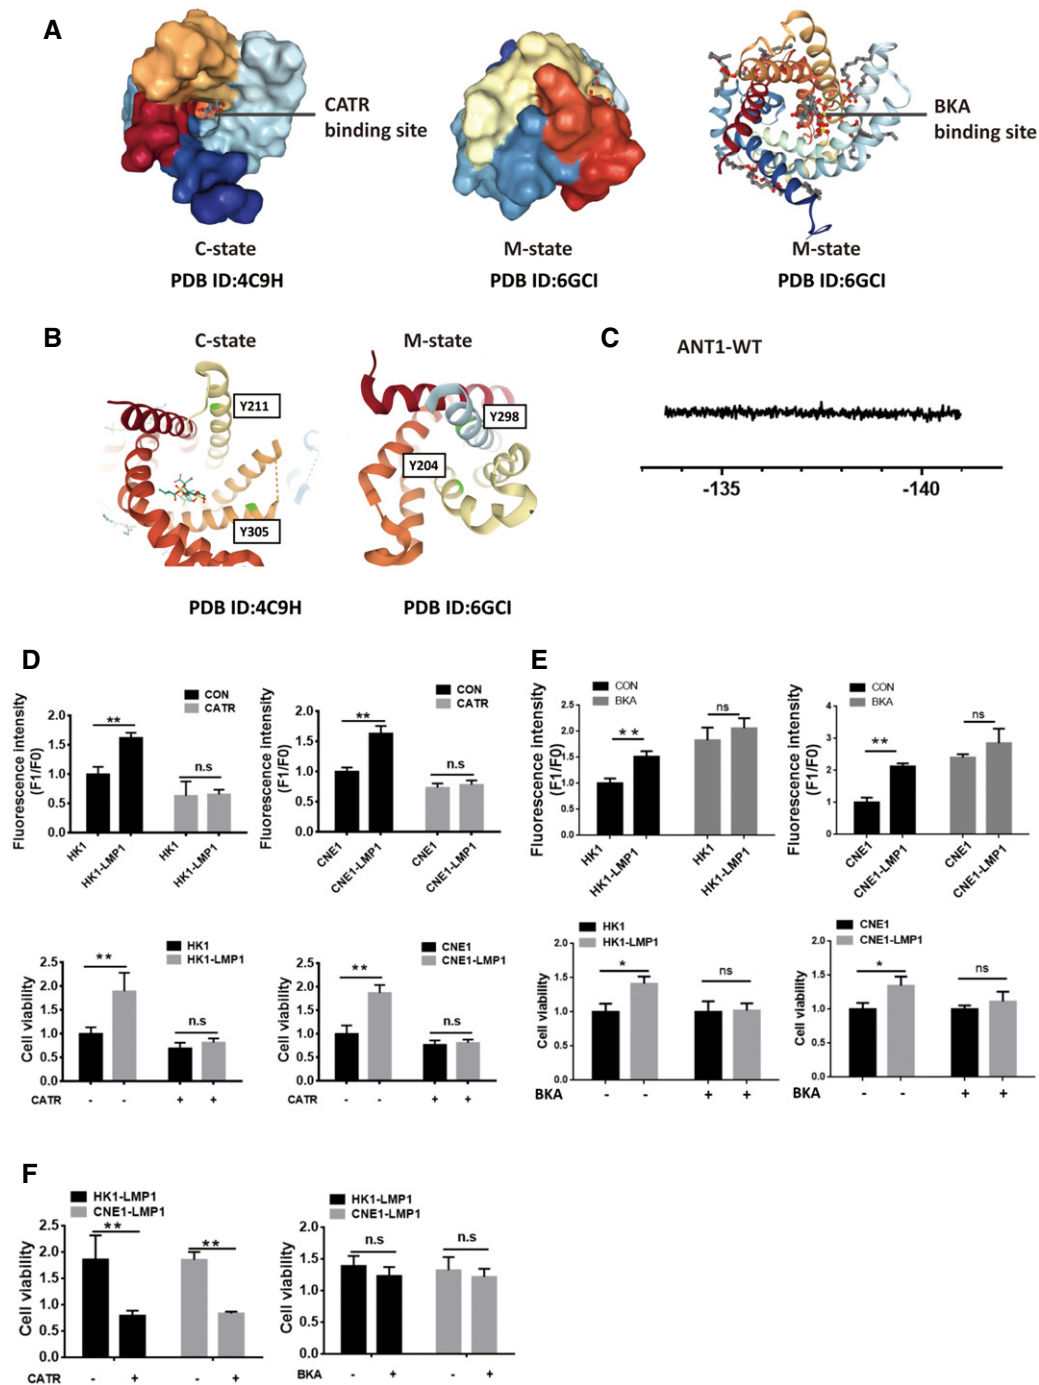

**Figure EV2. Effect of BKA and CATR inhibitors on nasopharyngeal carcinoma cell function.**

A Binding sites of BKA and CATR inhibitors to the ADP/ATP transporter.

B Spatial position of Y195 and Y290 in two different conformations of ANTI1. Y195 (yeast: Y211; *Saccharomyces cerevisiae*: Y204) and Y290 (yeast: Y305; *Saccharomyces cerevisiae*: Y298).

C  $^{19}\text{F}$ -NMR assay of ANTI1-WT as a reference.

D Effects of CATR on nasopharyngeal carcinoma cell mitochondrial membrane potential and cell viability. “-” represents vehicle treatment only. Data are presented as means  $\pm$  SEM (paired *t*-test,  $n = 6$ , biological replicates per group,  $**P < 0.01$ ).

E Effects of BKA on nasopharyngeal carcinoma cell mitochondrial membrane potential and viability. “-” represents vehicle treatment only. Data are presented as means  $\pm$  SEM (paired *t*-test,  $n = 6$ , biological replicates per group,  $*P < 0.05$ ,  $**P < 0.01$ ).

F Cell viability assay in LMP1-positive NPC cells in CATR/BKA untreated group vs. treated group. “-” represents vehicle treatment only. Data are presented as means  $\pm$  SEM (paired *t*-test,  $n = 6$ , biological replicates per group,  $**P < 0.01$ ).

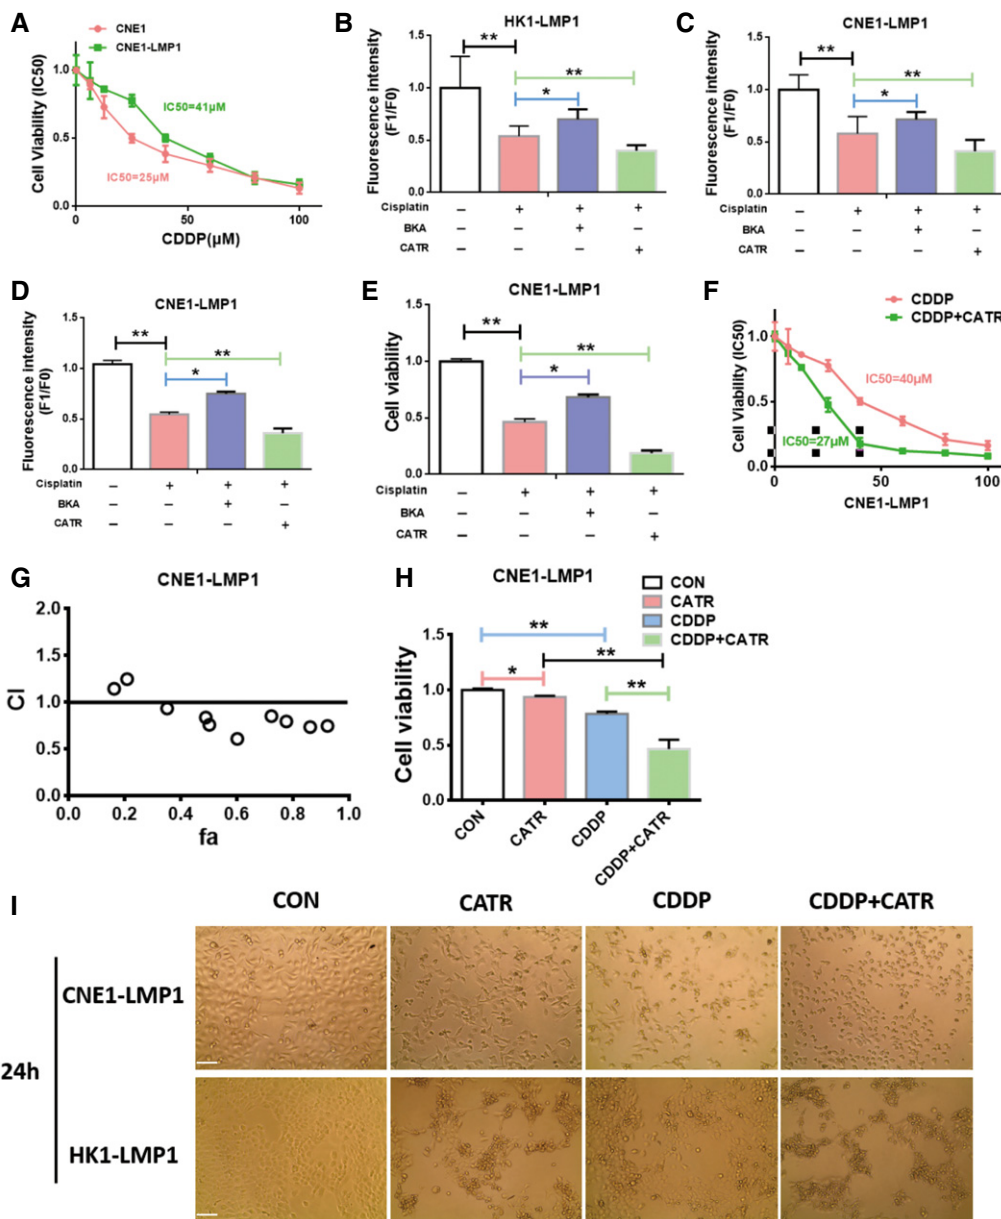

**Figure EV3. CATR enhances the sensitivity of NPC cells to cisplatin.**

A CNE1 and CNE1-LMP1 cells were treated for 24 h with increasing concentrations of cisplatin. Cell viability was determined by MTS assay. Data are presented as means ± SEM ( $n = 6$ , biological replicates per group).

B, C LMP1-positive NPC cells were treated with cisplatin for 24 h and BKA (1 μM)/CATR was added for immediate detection of mitochondrial membrane potential. Data are presented as means ± SEM (paired  $t$ -test,  $n = 6$ , biological replicates per group,  $*P < 0.05$ ,  $**P < 0.01$ ).

D, E Changes in mitochondrial membrane potential and viability of and CNE1-LMP1 cells treated for 24 h with cisplatin (20 μM) alone or cisplatin (20 μM) combined with BKA (1 μM)/CATR (1 μM). Mitochondrial membrane potential of cells was analyzed by using flow cytometry (B), and viability was measured by the CCK-8 assay (C). Data are presented as means ± SEM (paired  $t$ -test,  $n = 6$ , biological replicates per group,  $*P < 0.05$ ,  $**P < 0.01$ ).

F The IC<sub>50</sub> value of the combination of CATR and cisplatin in CNE1-LMP1 was changed. Data are presented as means ± SEM ( $n = 6$ , biological replicates per group).

G The combination index of cisplatin and CATR in CNE1-LMP1 cells (note: CI < 1 indicates synergism; CI = 1 indicates an additive effect; and CI > 1 indicates antagonism).

H CCK-8 analysis of viability in CNE1-LMP1 cells treated for 24 h with CATR (1 μM) alone, cisplatin (20 μM) alone, or cisplatin (20 μM) combined with CATR (1 μM). Data are presented as means ± SEM (paired  $t$ -test,  $n = 6$ , biological replicates per group,  $*P < 0.05$ ,  $**P < 0.01$ ).

I Morphology of NPC cells treated for 24 h with vehicle, cisplatin, CATR, or a combination of cisplatin and CATR (scale bar, 100 μm).
