# Supplementary material for: Conformational change of adenine nucleotide translocase‐1 mediates cisplatin resistance induced by EBV‐LMP1
Source: PubMed Central journal article supplement (PMC8649884; doi:10.15252/emmm.202114072), 2021-11-09
Supplement: EMMM-13-e14072-s006.pdf [file EMMM-13-e14072-s006.pdf]

## Appendix

### Conformational change of adenine nucleotide translocase-1 mediates cisplatin resistance induced by EBV-LMP1

Table of content:  
Appendix Table S1

Appendix Table S1. P-Value list.

| Figure                                     | p-value |
|--------------------------------------------|---------|
| Fig.1 A (CNE1 vs. CNE1-LMP1)               | 0.005   |
| Fig.1 A (HK1 vs. HK1-LMP1)                 | 0.039   |
| Fig.1 B (CNE1 vs. CNE1-LMP1)               | 0.006   |
| Fig.1 B (HK1 vs. HK1-LMP1)                 | 0.004   |
| Fig.1 C (CNE1 vs. CNE1-LMP1)               | 0.000   |
| Fig.1 C (HK1 vs. HK1-LMP1)                 | 0.001   |
| Fig.1 D (CNE1 vs. CNE1-LMP1)               | 0.005   |
| Fig.1 D (HK1 vs. HK1-LMP1)                 | 0.002   |
| Fig.3 B (Vector vs. BKA(10 $\mu$ M))       | 0.009   |
| Fig.3 B (Vector vs. CATR(20nM))            | 0.000   |
| Fig.3 D (Vector vs. LMP1(4ng))             | 0.004   |
| Fig.3 D (Vector vs. LMP1(8ng))             | 0.003   |
| Fig.4 B (Vehicle HK1 vs. HK1-LMP1)         | 0.000   |
| Fig.4 B (Vehicle CNE1 vs. CNE1-LMP1)       | 0.001   |
| Fig.4 D (HK1-CON vs. HK1-BKA)              | 0.000   |
| Fig.4 D (HK1-CON vs. HK1-CATR)             | 0.000   |
| Fig.4 D (HK1-CON vs. HK1-LMP1-CON)         | 0.049   |
| Fig.4 D (HK1-LMP1-CON vs. HK1-LMP1-BKA)    | 0.003   |
| Fig.4 D (HK1-LMP1-CON vs. HK1-LMP1-CATR)   | 0.001   |
| Fig.4 D (CNE1-CON vs. CNE1-BKA)            | 0.000   |
| Fig.4 D (CNE1-CON vs. CNE1-CATR)           | 0.000   |
| Fig.4 D (CNE1-CON vs. CNE1-LMP1-CON)       | 0.042   |
| Fig.4 D (CNE1-LMP1-CON vs. CNE1-LMP1-BKA)  | 0.005   |
| Fig.4 D (CNE1-LMP1-CON vs. CNE1-LMP1-CATR) | 0.004   |
| Fig.5 B (CDDP vs. CON)                     | 0.002   |
| Fig.5 B (CDDP vs. BKA+CDDP)                | 0.048   |
| Fig.5 B (CDDP vs. CATR+CDDP)               | 0.009   |
| Fig.5 C (CDDP vs. CON)                     | 0.000   |
| Fig.5 C (CDDP vs. BKA+CDDP)                | 0.045   |
| Fig.5 C (CDDP vs. CATR+CDDP)               | 0.021   |
| Fig.5 F (CDDP vs. CON)                     | 0.008   |
| Fig.5 F (CDDP vs. CATR+CDDP)               | 0.005   |
| Fig.5 F (CATR vs. CON)                     | 0.046   |
| Fig.5 F (CATR vs. CATR+CDDP)               | 0.003   |
| Fig.5 G CNE1-LMP1 (CON vs. CATR)           | 0.015   |
| Fig.5 G CNE1-LMP1 (CON vs. CDDP)           | 0.007   |
| Fig.5 G CNE1-LMP1 (CATR vs. CATR+CDDP)     | 0.005   |
| Fig.5 G HK1-LMP1 (CON vs. CATR)            | 0.044   |
| Fig.5 G HK1-LMP1 (CON vs. CDDP)            | 0.023   |
| Fig.5 G HK1-LMP1 (CATR vs. CATR+CDDP)      | 0.002   |
| Fig.5 H CNE1-LMP1 (CON vs. CATR)           | 0.008   |

|                                                   |       |
|---------------------------------------------------|-------|
| Fig.5 H CNE1-LMP1 (CON vs. CDDP)                  | 0.005 |
| Fig.5 H CNE1-LMP1 (CATR vs. CATR+CDDP)            | 0.007 |
| Fig.5 H HK1-LMP1 (CON vs. CATR)                   | 0.008 |
| Fig.5 H HK1-LMP1 (CON vs. CDDP)                   | 0.000 |
| Fig.5 H HK1-LMP1 (CATR vs. CATR+CDDP)             | 0.005 |
| Fig.6 C (Vehicle vs. CATR)                        | 0.035 |
| Fig.6 C (Vehicle vs. CDDP)                        | 0.004 |
| Fig.6 C (CDDP vs. CDDP+CATR)                      | 0.042 |
| Fig.6 D (Vehicle vs. CATR)                        | 0.041 |
| Fig.6 D (Vehicle vs. CDDP)                        | 0.006 |
| Fig.6 D (CDDP+CATR vs. CATR)                      | 0.000 |
| Fig.6 D (CDDP+CATR vs. CDDP)                      | 0.004 |
| Fig.6 E (CDDP vs. Vehicle)                        | 0.001 |
| Fig.6 E (CDDP vs. CDDP+CATR)                      | 0.048 |
| Fig.6 F (Vehicle vs. CATR)                        | 0.045 |
| Fig.6 F (Vehicle vs. CDDP)                        | 0.007 |
| Fig.6 F (CDDP+CATR vs. CATR)                      | 0.000 |
| Fig.6 F (CDDP+CATR vs. CDDP)                      | 0.005 |
| Fig.6 G (Vehicle vs. CATR)                        | 0.011 |
| Fig.6 G (Vehicle vs. CDDP)                        | 0.008 |
| Fig.6 G (CDDP+CATR vs. CATR)                      | 0.002 |
| Fig.6 G (CDDP+CATR vs. CDDP)                      | 0.006 |
| FigEV.1 B siRNA-CON (HK1 vs. HK1-LMP1)            | 0.025 |
| FigEV.1 B siRNA-ANT1-2# (HK1 vs. HK1-LMP1)        | 0.074 |
| FigEV.1 B siRNA-ANT1-3# (HK1 vs. HK1-LMP1)        | 0.171 |
| FigEV.1 B siRNA-ANT2-1# (HK1 vs. HK1-LMP1)        | 0.016 |
| FigEV.1 B siRNA-ANT2-2# (HK1 vs. HK1-LMP1)        | 0.017 |
| FigEV.1 B siRNA-VDAC1-2# (HK1 vs. HK1-LMP1)       | 0.205 |
| FigEV.1 B siRNA-VDAC1-3# (HK1 vs. HK1-LMP1)       | 0.401 |
| FigEV.1 B siRNA-VDAC2-1# (HK1 vs. HK1-LMP1)       | 0.013 |
| FigEV.1 B siRNA-VDAC2-3# (HK1 vs. HK1-LMP1)       | 0.017 |
| FigEV.1 B siRNA-CypD-1# (HK1 vs. HK1-LMP1)        | 0.009 |
| FigEV.1 B siRNA-CypD-3# (HK1 vs. HK1-LMP1)        | 0.001 |
| FigEV.1 B siRNA-CON (CNE1 vs. CNE1-LMP1)          | 0.043 |
| FigEV.1 B siRNA-ANT1-2# (CNE1 vs. CNE1-LMP1)      | 0.173 |
| FigEV.1 B siRNA-ANT1-3# (CNE1 vs. CNE1-LMP1)      | 0.266 |
| FigEV.1 B siRNA-ANT2-1# (CNE1 vs. CNE1-LMP1)      | 0.039 |
| FigEV.1 B siRNA-ANT2-2# (CNE1 vs. CNE1-LMP1)      | 0.017 |
| FigEV.1 B siRNA-VDAC1-2# (CNE1 vs. CNE1-LMP1)     | 0.165 |
| FigEV.1 B siRNA-VDAC1-3# (CNE1 vs. CNE1-LMP1)     | 0.023 |
| FigEV.1 B siRNA-VDAC2-1# (CNE1 vs. CNE1-LMP1)     | 0.013 |
| FigEV.1 B siRNA-VDAC2-3# (CNE1 vs. CNE1-LMP1)     | 0.048 |
| FigEV.1 B siRNA-CypD-1# (CNE1 vs. CNE1-LMP1)      | 0.011 |
| FigEV.1 B siRNA-CypD-3# (CNE1 vs. CNE1-LMP1)      | 0.006 |
| FigEV.2 D TMRM-CON (HK1 vs. HK1-LMP1)             | 0.004 |
| FigEV.2 D TMRM-CATR (HK1 vs. HK1-LMP1)            | 0.021 |
| FigEV.2 D TMRM-CON (CNE1 vs. CNE1-LMP1)           | 0.002 |
| FigEV.2 D TMRM-CATR (CNE1 vs. CNE1-LMP1)          | 0.282 |
| FigEV.2 D Cell viability-CON (HK1 vs. HK1-LMP1)   | 0.007 |
| FigEV.2 D Cell viability-CATR (HK1 vs. HK1-LMP1)  | 0.821 |
| FigEV.2 D Cell viability-CON (CNE1 vs. CNE1-LMP1) | 0.001 |

|                                                           |              |
|-----------------------------------------------------------|--------------|
| <b>FigEV.2 D Cell viability-CATR (CNE1 vs. CNE1-LMP1)</b> | <b>0.782</b> |
| <b>FigEV.2 E TMRM-CON (HK1 vs. HK1-LMP1)</b>              | <b>0.004</b> |
| <b>FigEV.2 E TMRM-BKA (HK1 vs. HK1-LMP1)</b>              | <b>0.549</b> |
| <b>FigEV.2 E TMRM-CON (CNE1 vs. CNE1-LMP1)</b>            | <b>0.008</b> |
| <b>FigEV.2 E TMRM-BKA (CNE1 vs. CNE1-LMP1)</b>            | <b>0.620</b> |
| <b>FigEV.2 E Cell viability-CON (HK1 vs. HK1-LMP1)</b>    | <b>0.041</b> |
| <b>FigEV.2 E Cell viability-BKA (HK1 vs. HK1-LMP1)</b>    | <b>0.611</b> |
| <b>FigEV.2 E Cell viability-CON (CNE1 vs. CNE1-LMP1)</b>  | <b>0.046</b> |
| <b>FigEV.2 E Cell viability-BKA (CNE1 vs. CNE1-LMP1)</b>  | <b>0.588</b> |
| <b>FigEV.2 F HK1-LMP1 (CATR(-) vs. CATR(+))</b>           | <b>0.000</b> |
| <b>FigEV.2 F HK1-LMP1 (BKA(-) vs. BKA(+))</b>             | <b>0.355</b> |
| <b>FigEV.2 F CNE1-LMP1 (CATR(-) vs. CATR(+))</b>          | <b>0.001</b> |
| <b>FigEV.2 F CNE1-LMP1 (BKA(-) vs. BKA(+))</b>            | <b>0.401</b> |
| <b>FigEV.3 C (CDDP vs. CON)</b>                           | <b>0.005</b> |
| <b>FigEV.3 C (CDDP vs. BKA+CDDP)</b>                      | <b>0.047</b> |
| <b>FigEV.3 C (CDDP vs. CATR+CDDP)</b>                     | <b>0.008</b> |
| <b>FigEV.3 D (CDDP vs. CON)</b>                           | <b>0.000</b> |
| <b>FigEV.3 D (CDDP vs. BKA+CDDP)</b>                      | <b>0.021</b> |
| <b>FigEV.3 D (CDDP vs. CATR+CDDP)</b>                     | <b>0.009</b> |
| <b>FigEV.3 E (CDDP vs. CON)</b>                           | <b>0.000</b> |
| <b>FigEV.3 E (CDDP vs. BKA+CDDP)</b>                      | <b>0.043</b> |
| <b>FigEV.3 E (CDDP vs. CATR+CDDP)</b>                     | <b>0.007</b> |
| <b>FigEV.3 H (CDDP vs. CON)</b>                           | <b>0.048</b> |
| <b>FigEV.3 H (CDDP vs. CATR+CDDP)</b>                     | <b>0.007</b> |
| <b>FigEV.3 H (CATR vs. CON)</b>                           | <b>0.009</b> |
| <b>FigEV.3 H (CATR vs. CATR+CDDP)</b>                     | <b>0.002</b> |
